# Supplementary material
Source: publisher figshare collection journal article supplement (https://frontiersin.figshare.com/ndownloader/files/14992691)

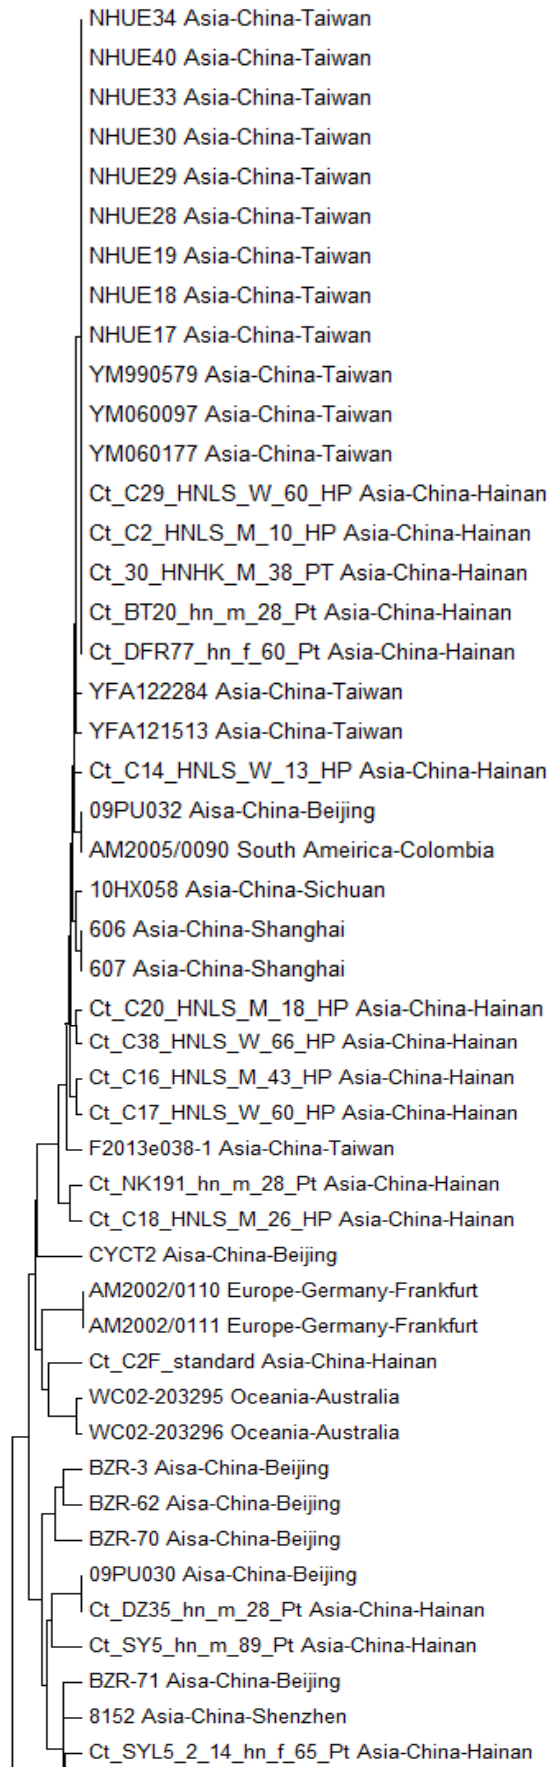

continued

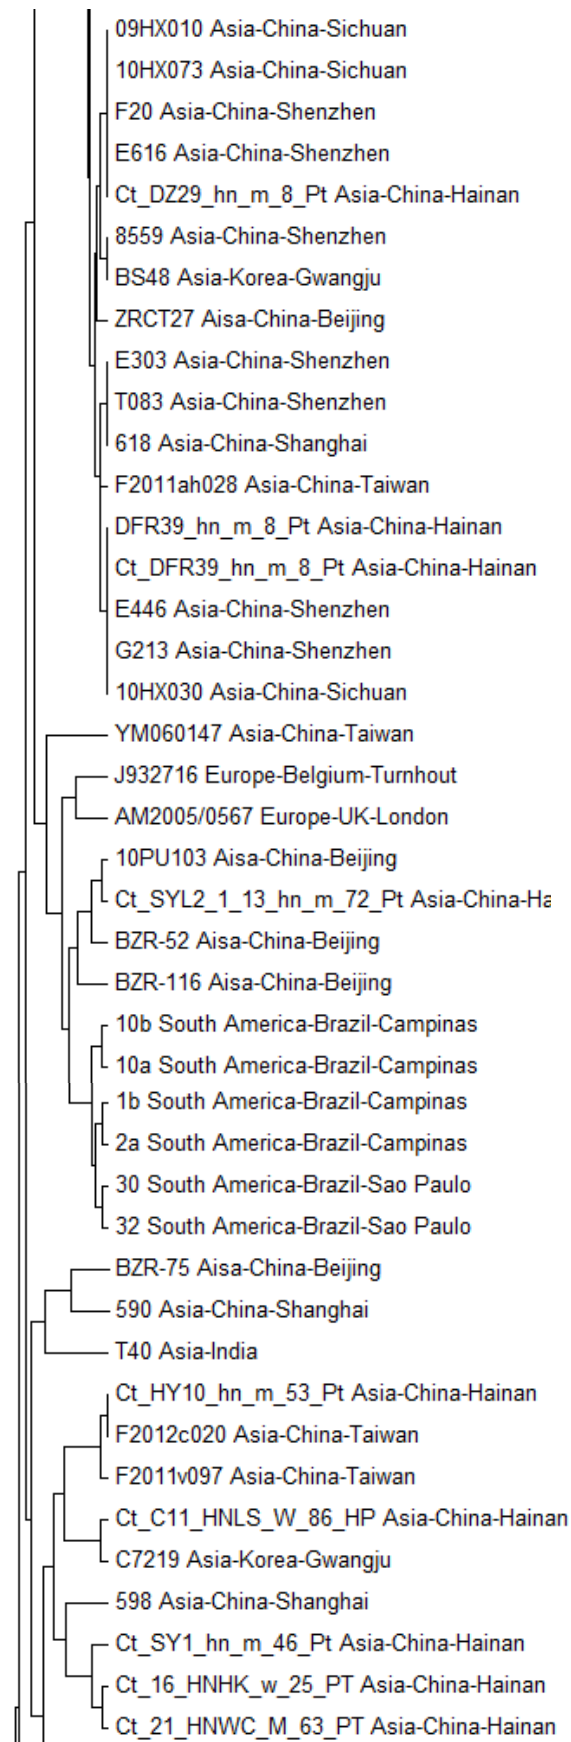

continued

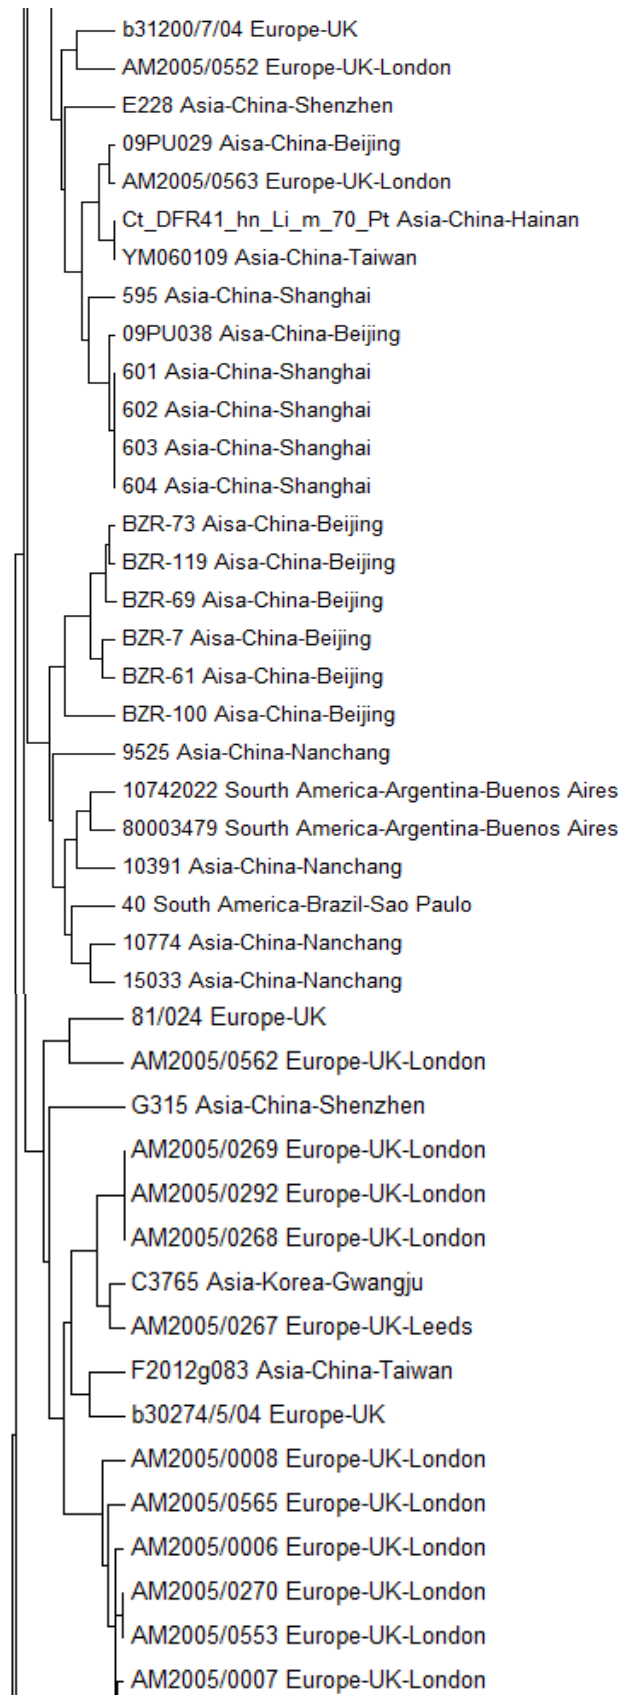

continued

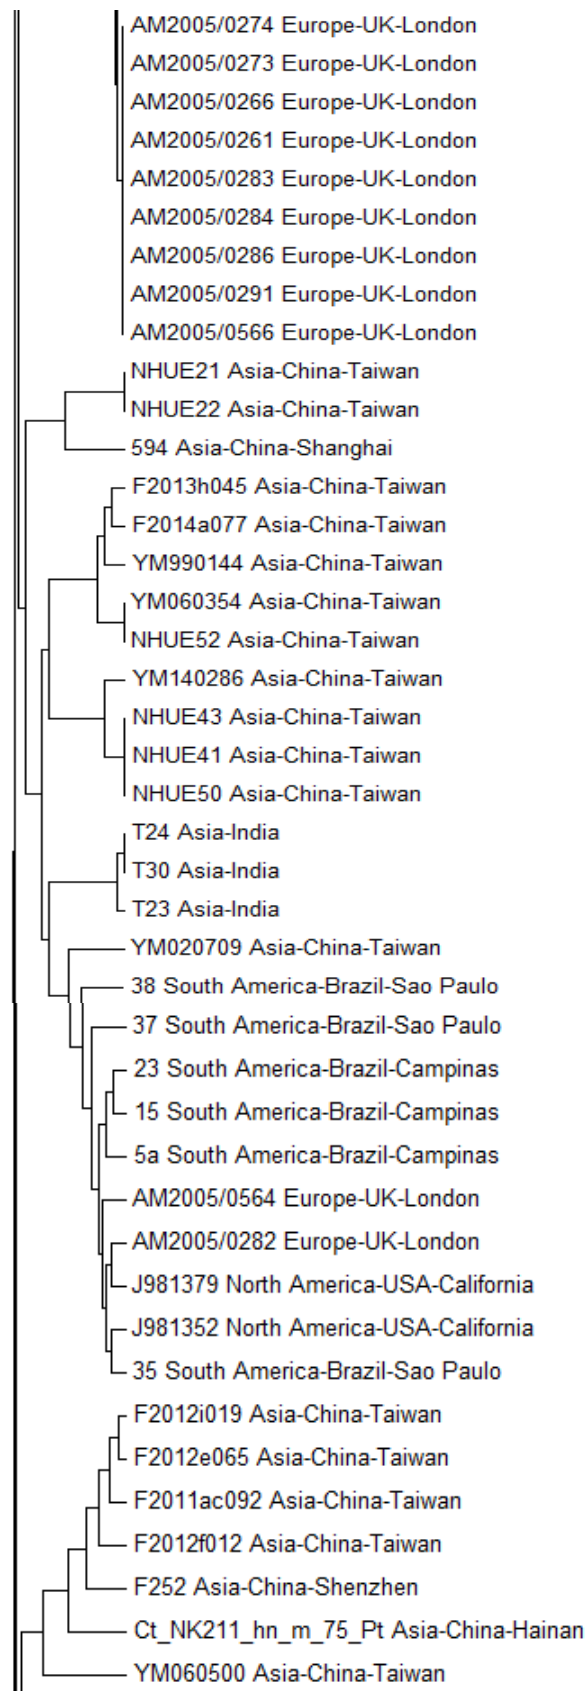

continued

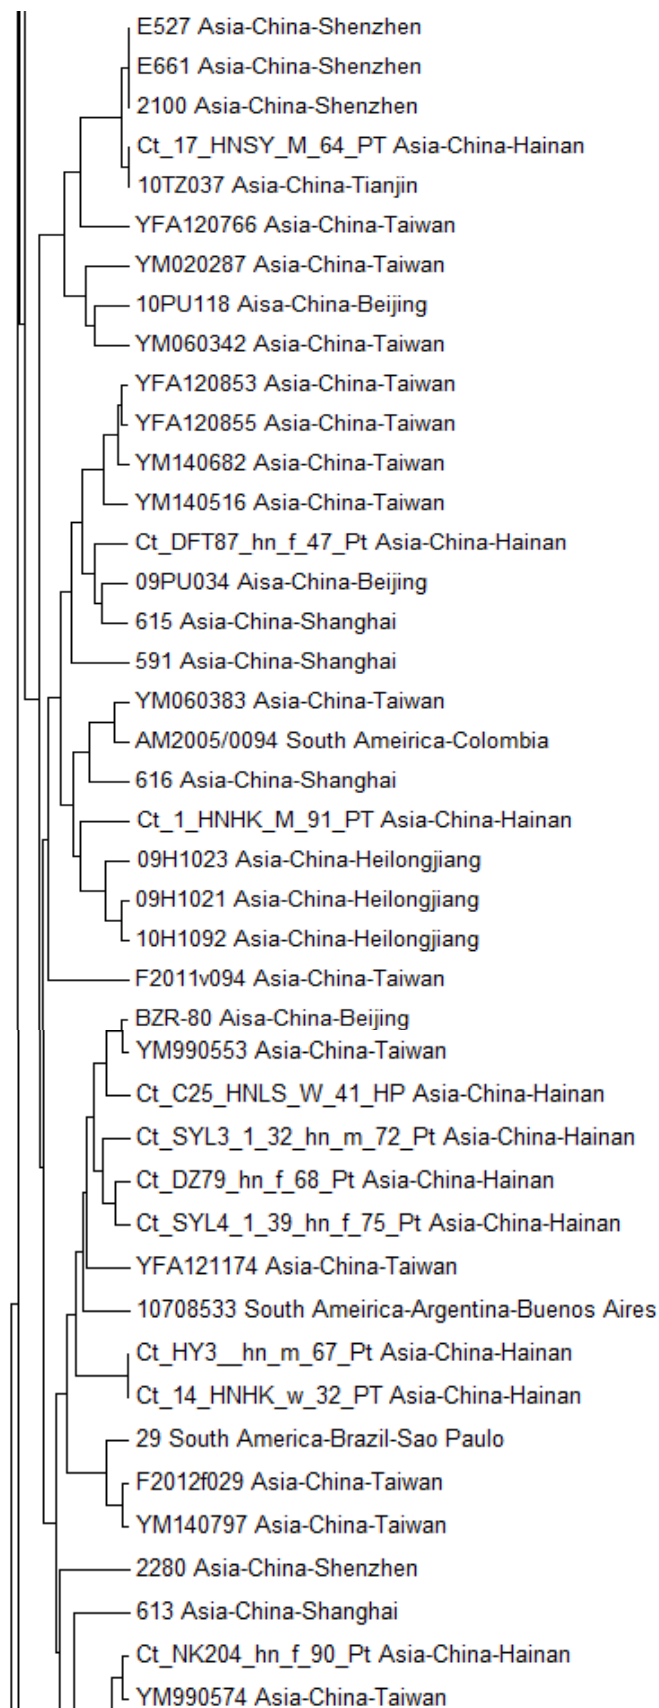

continued

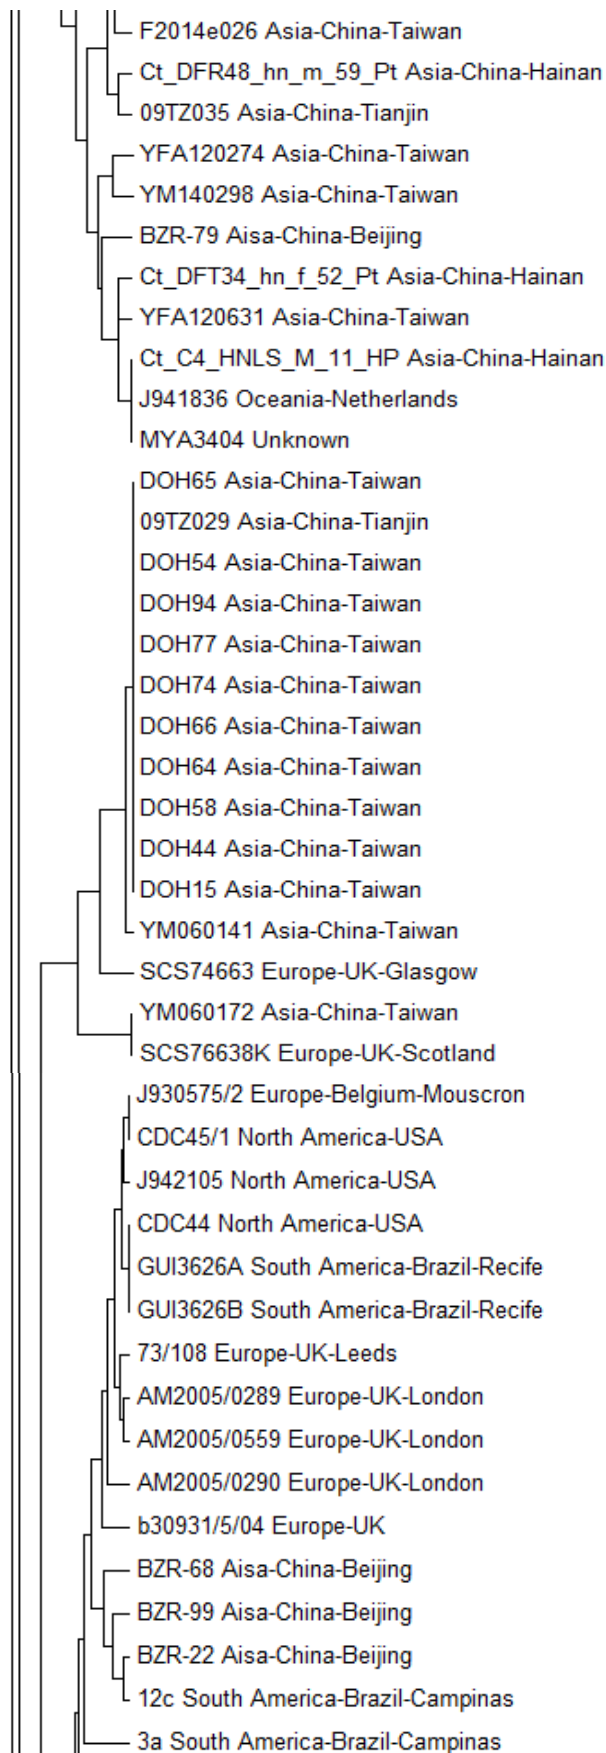

continued

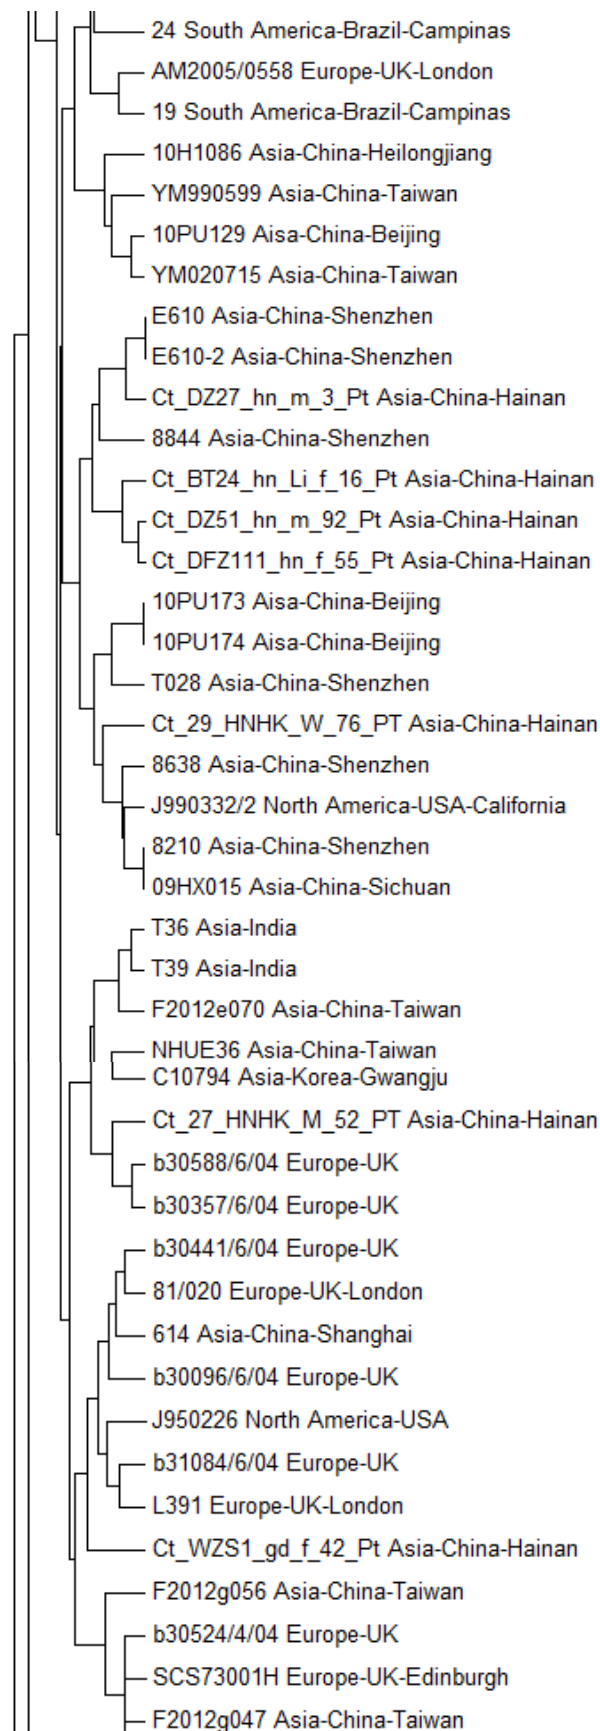

continued

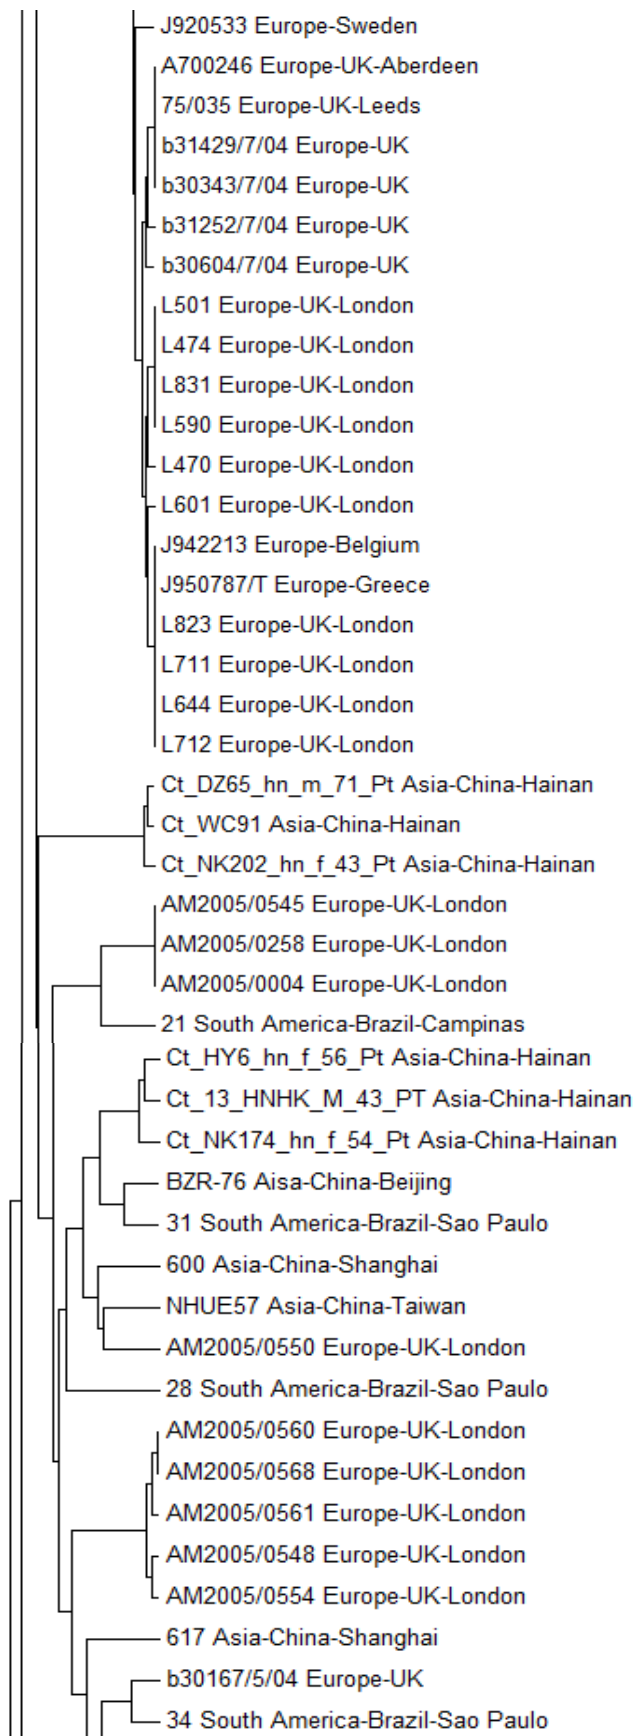

continued



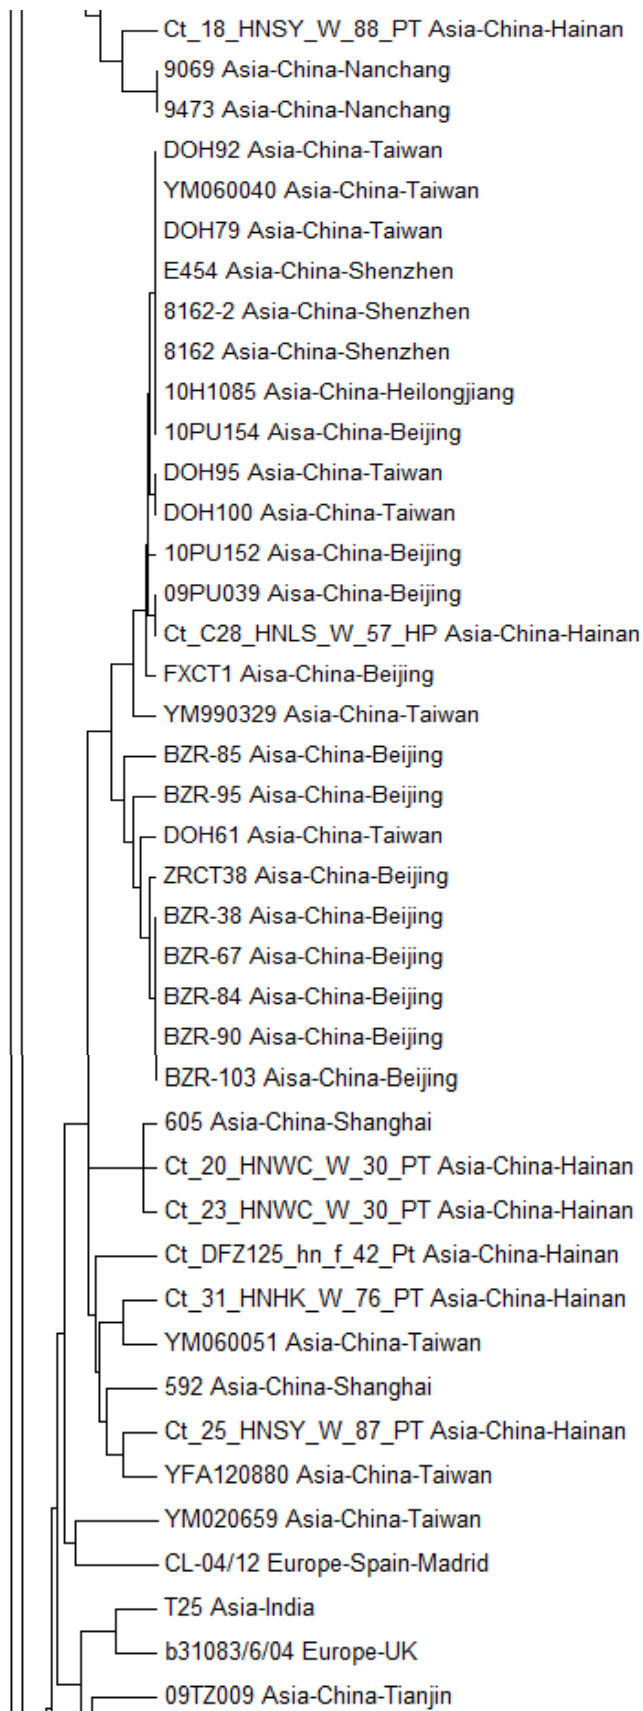

continued

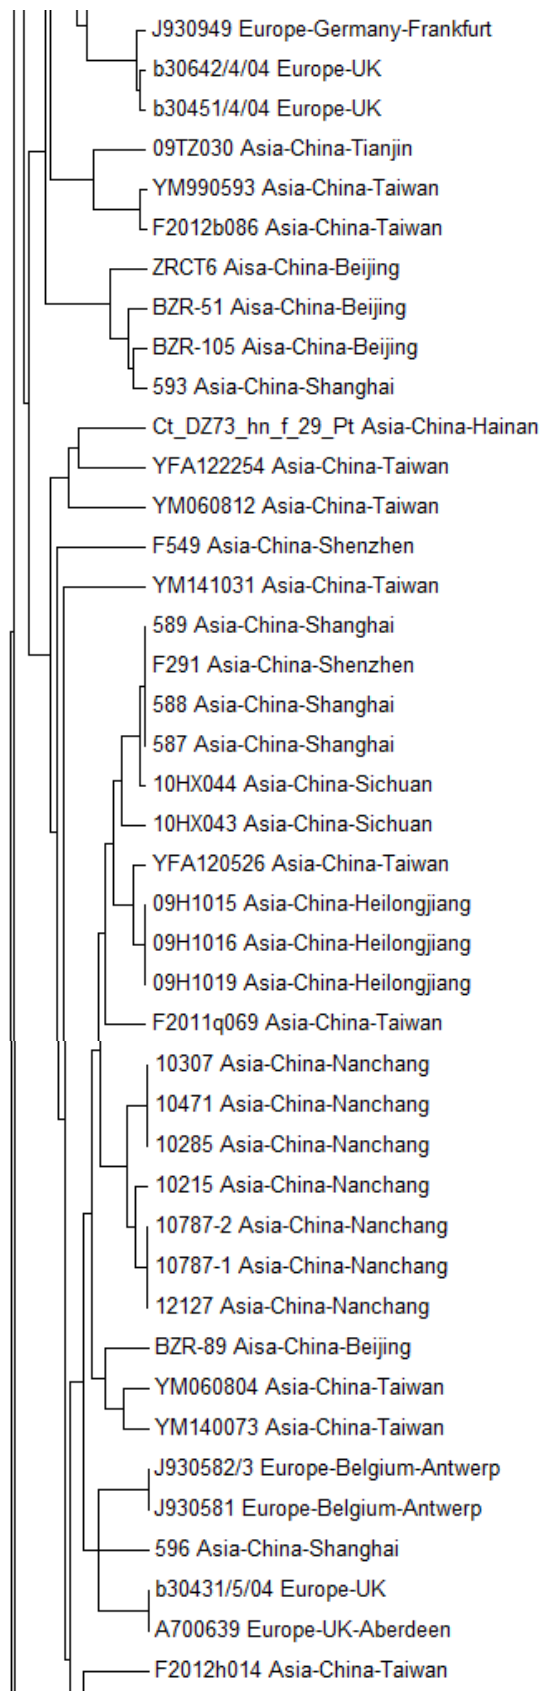

continued

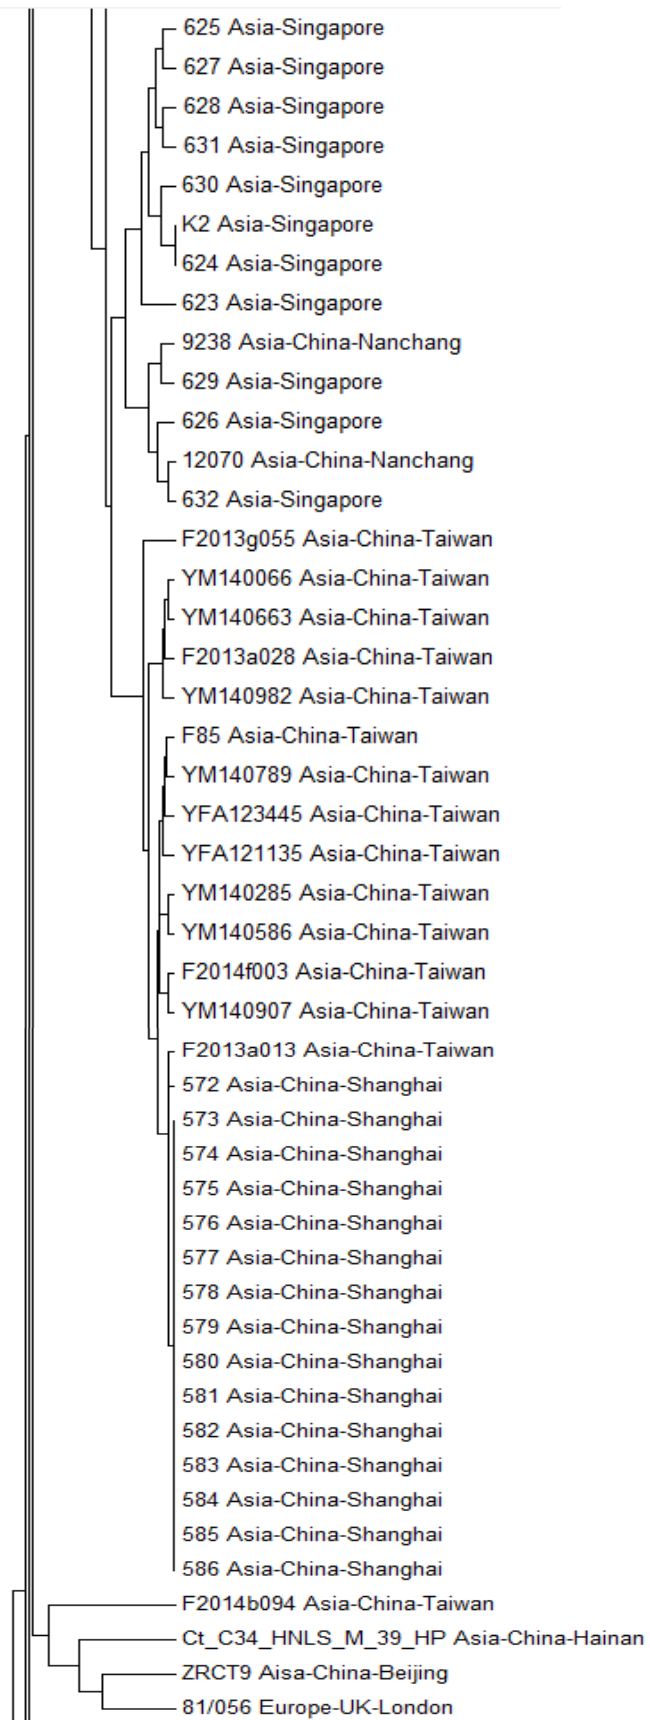

continued

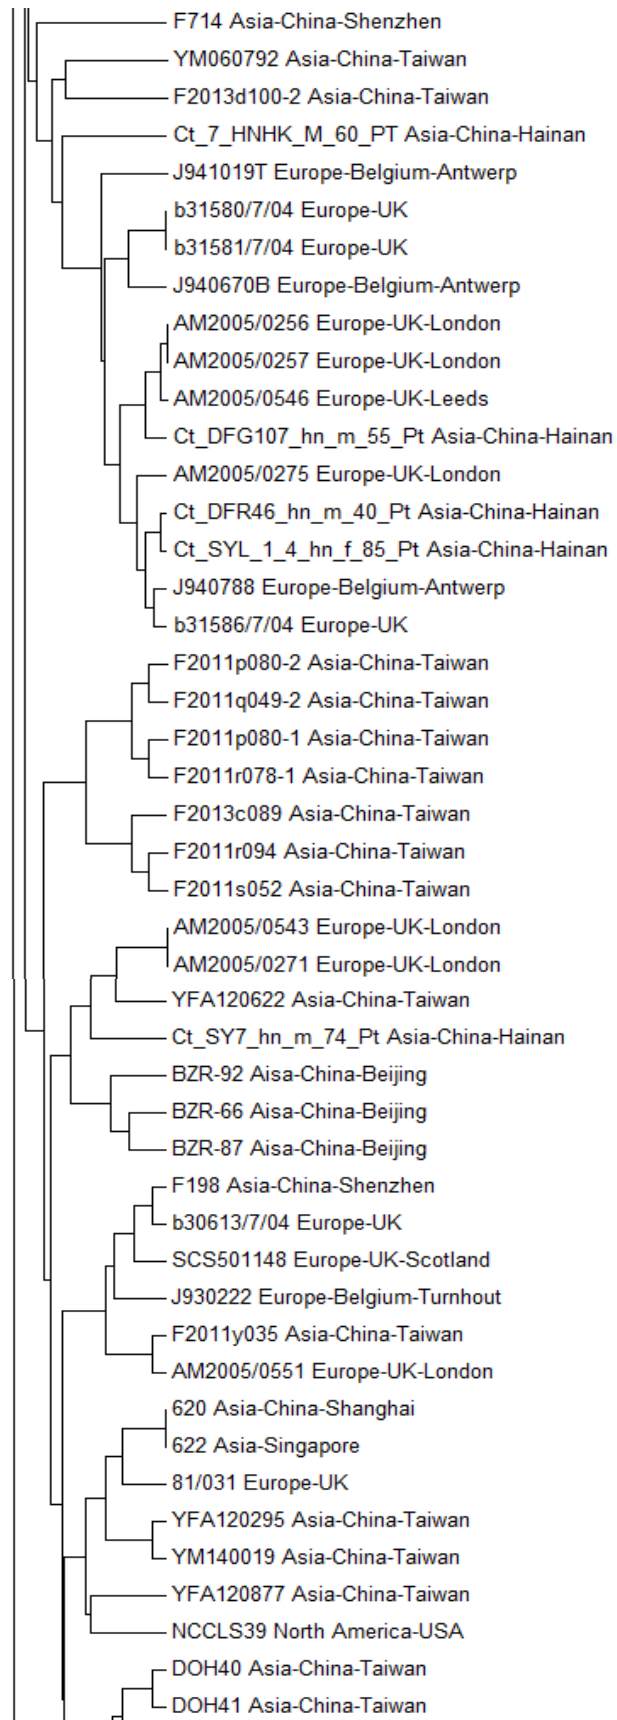

continued

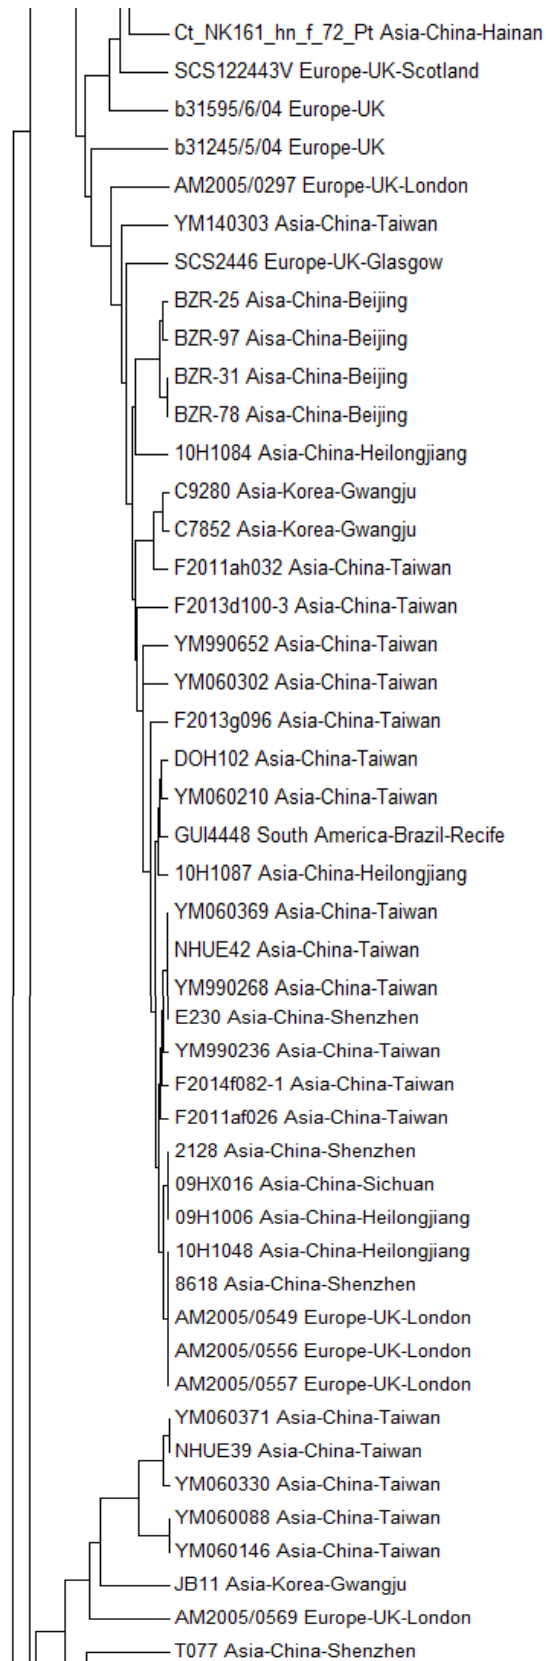

continued

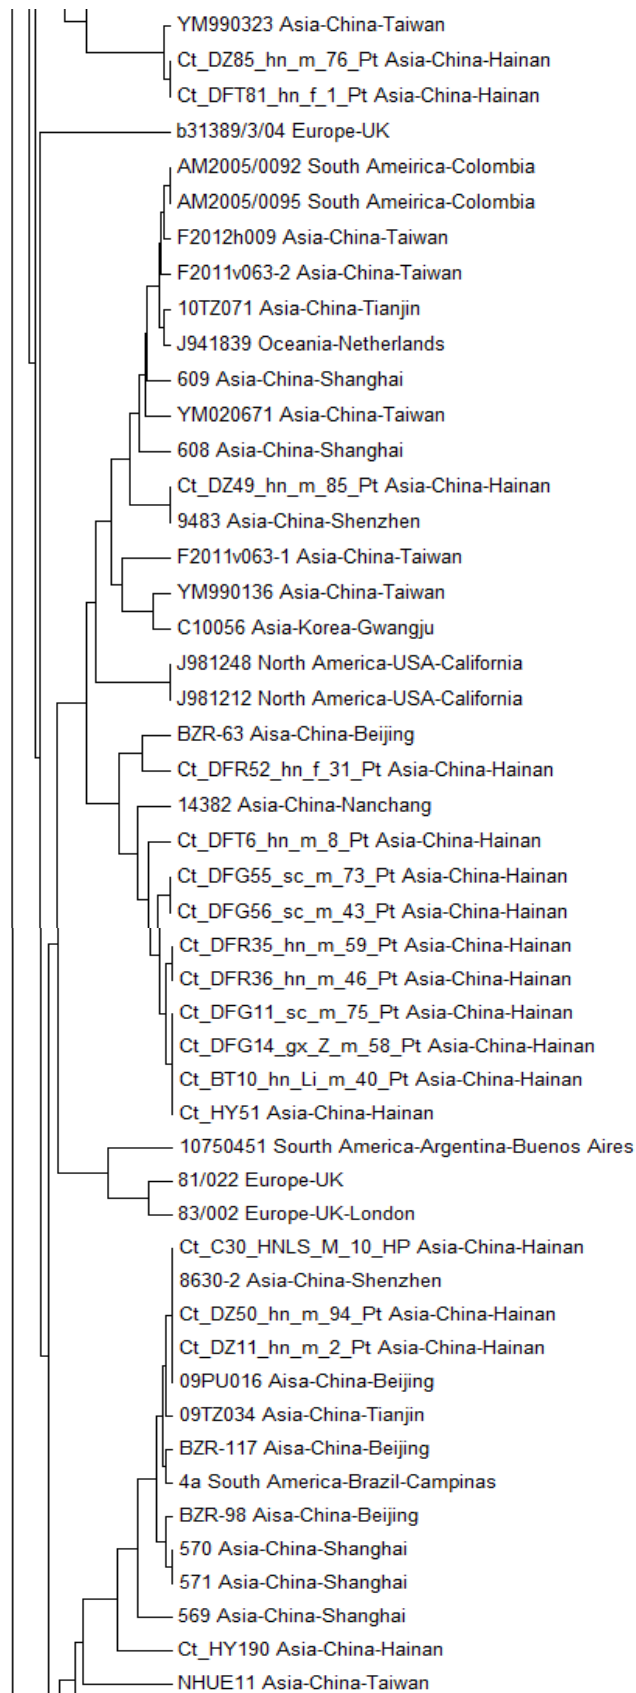

continued

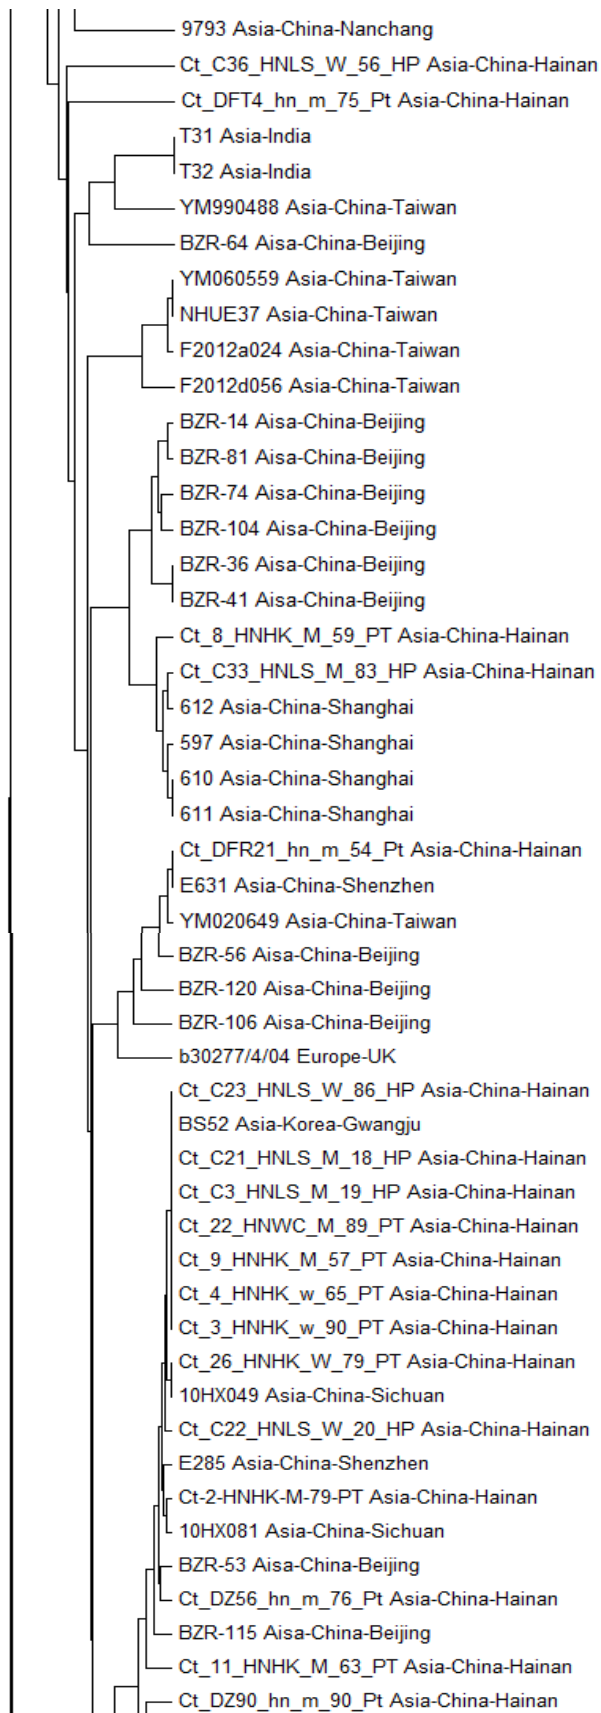

continued

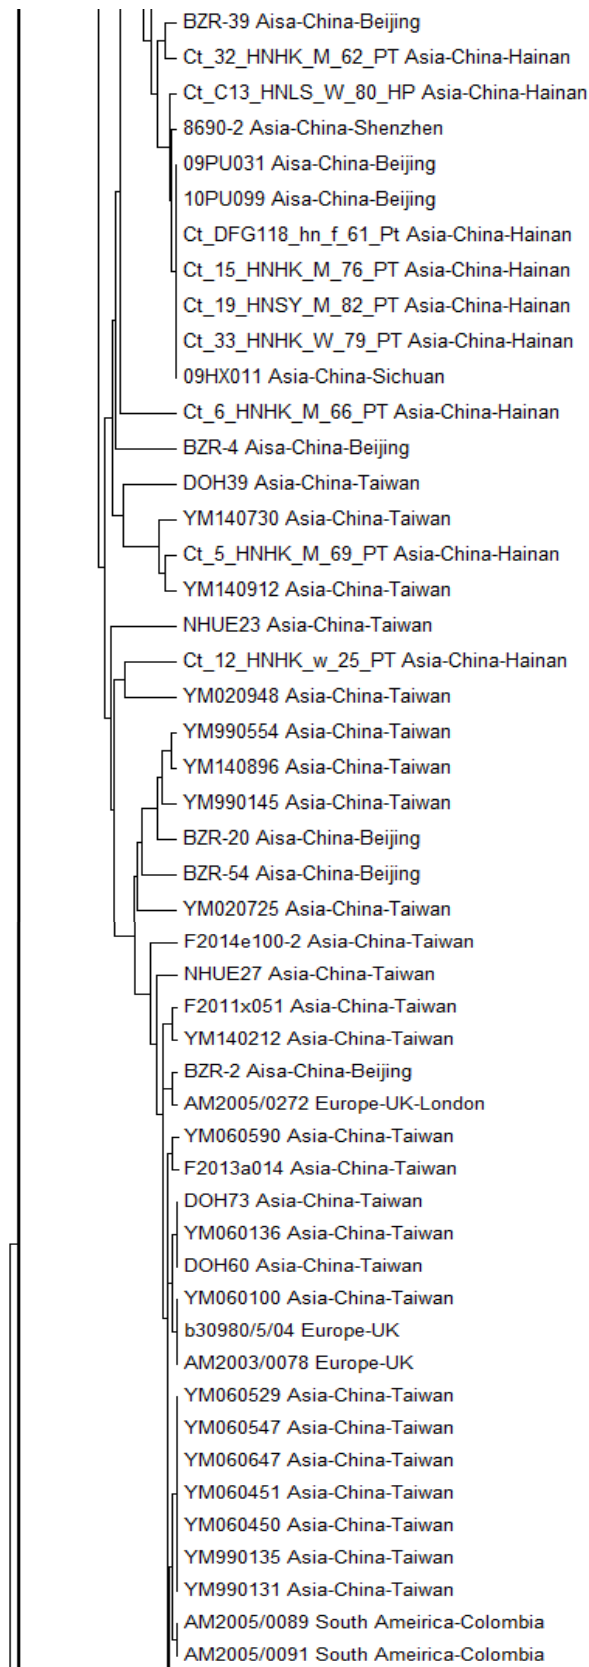

continued



888771

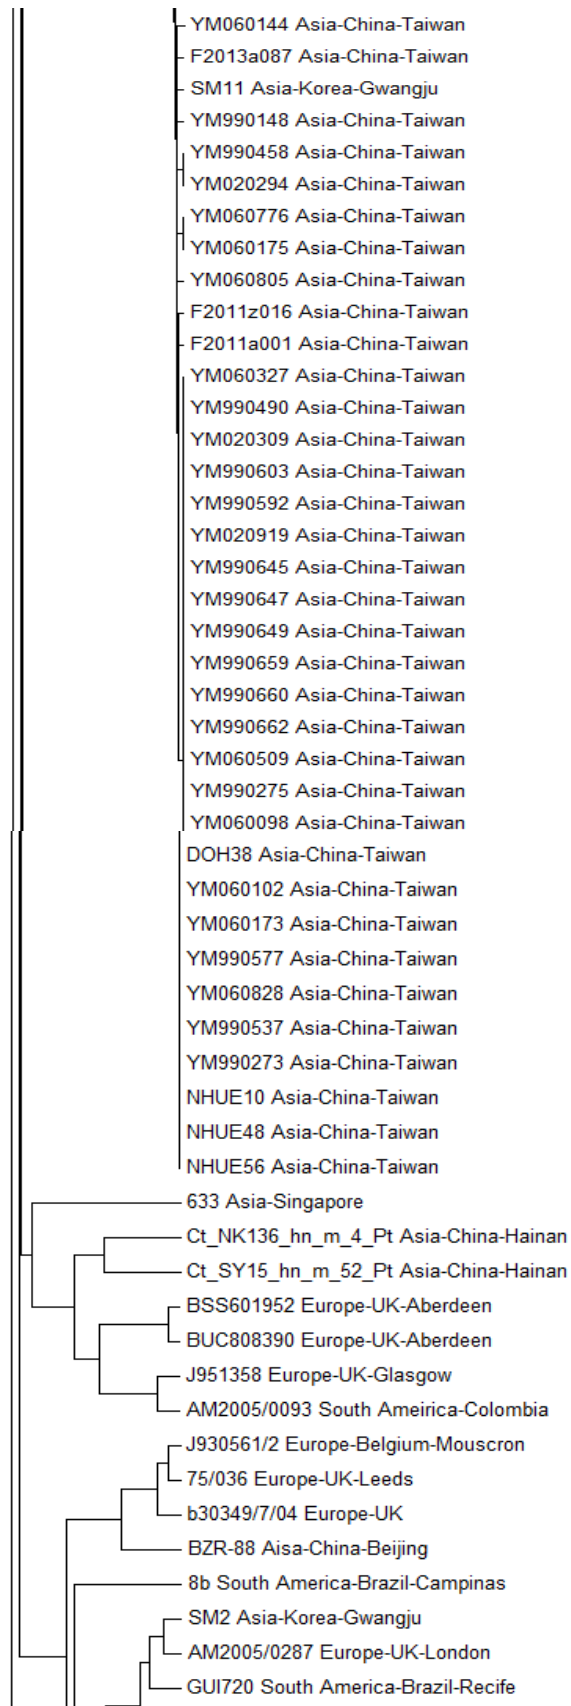

continued

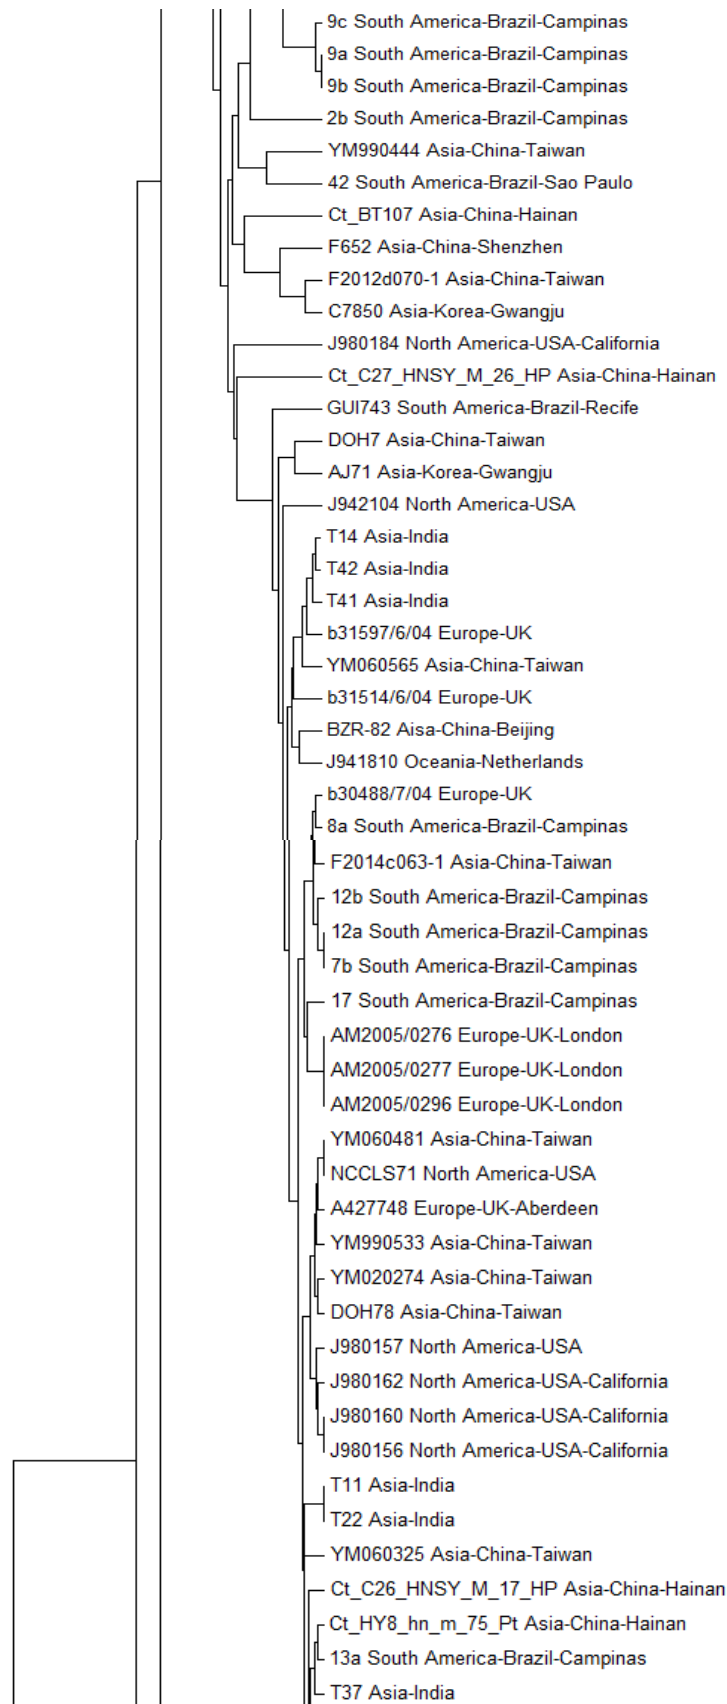

continued

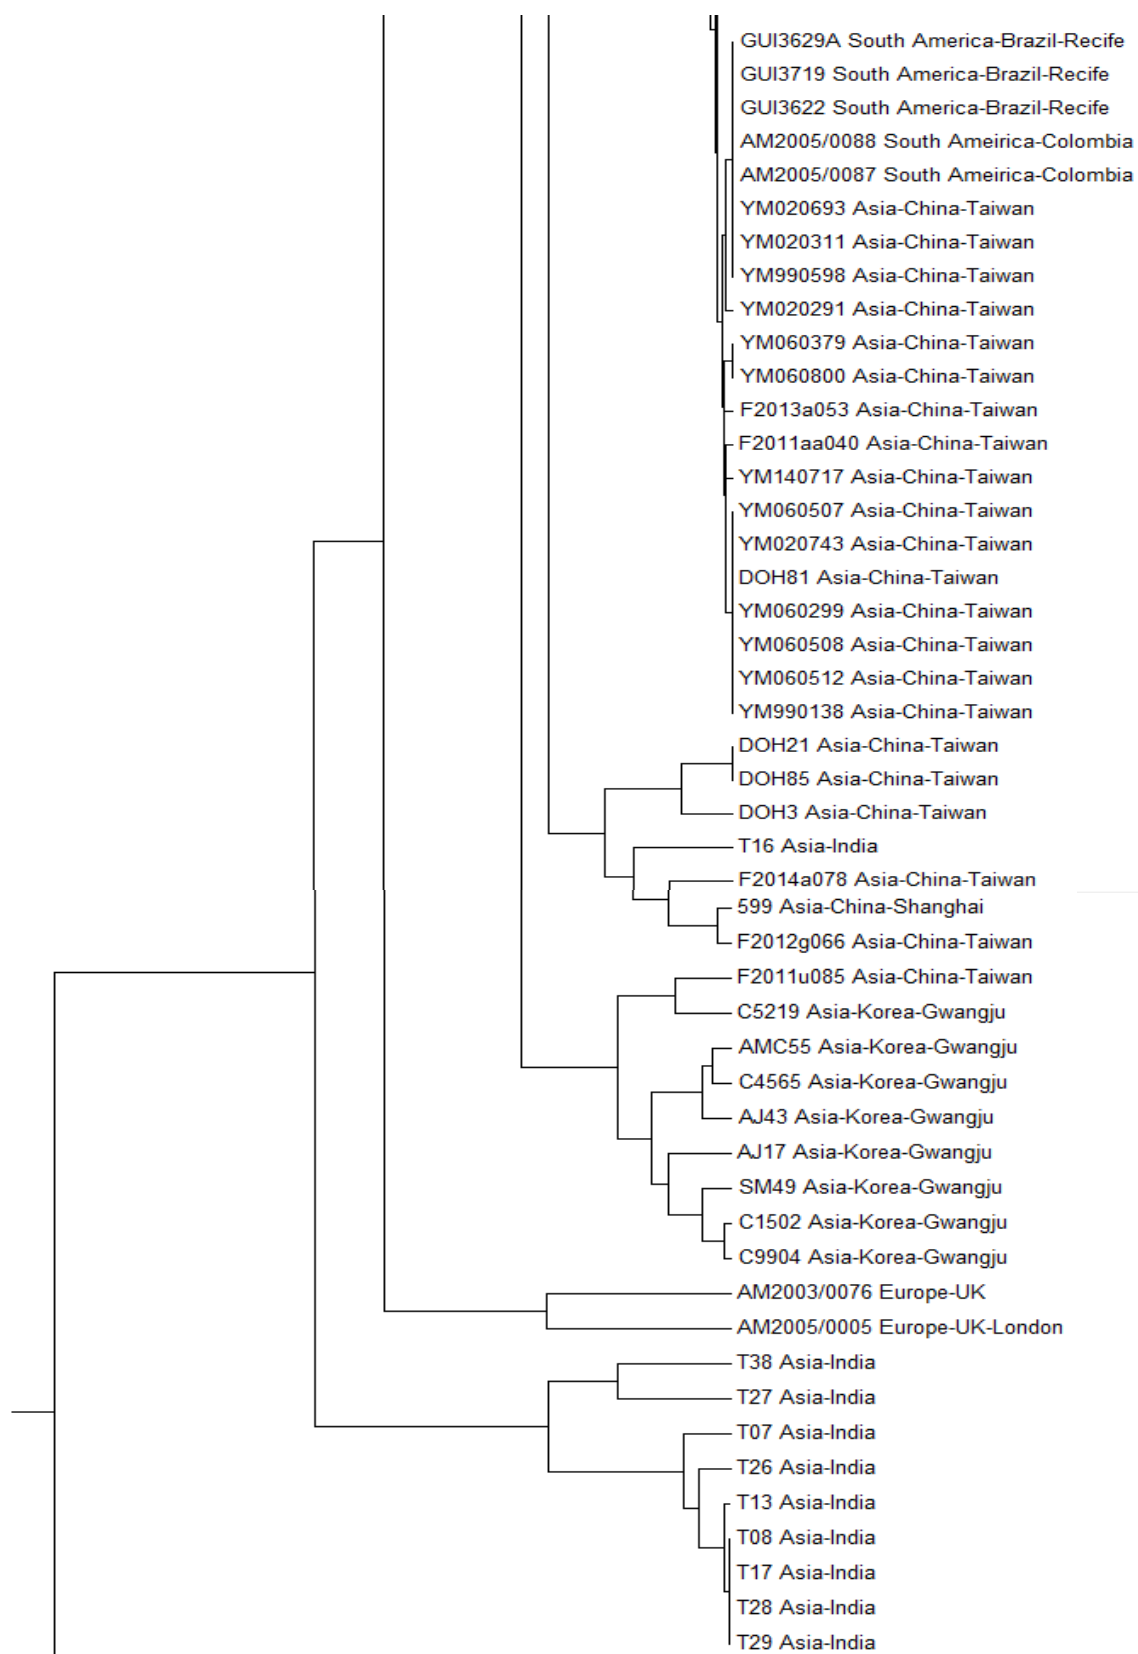

continued

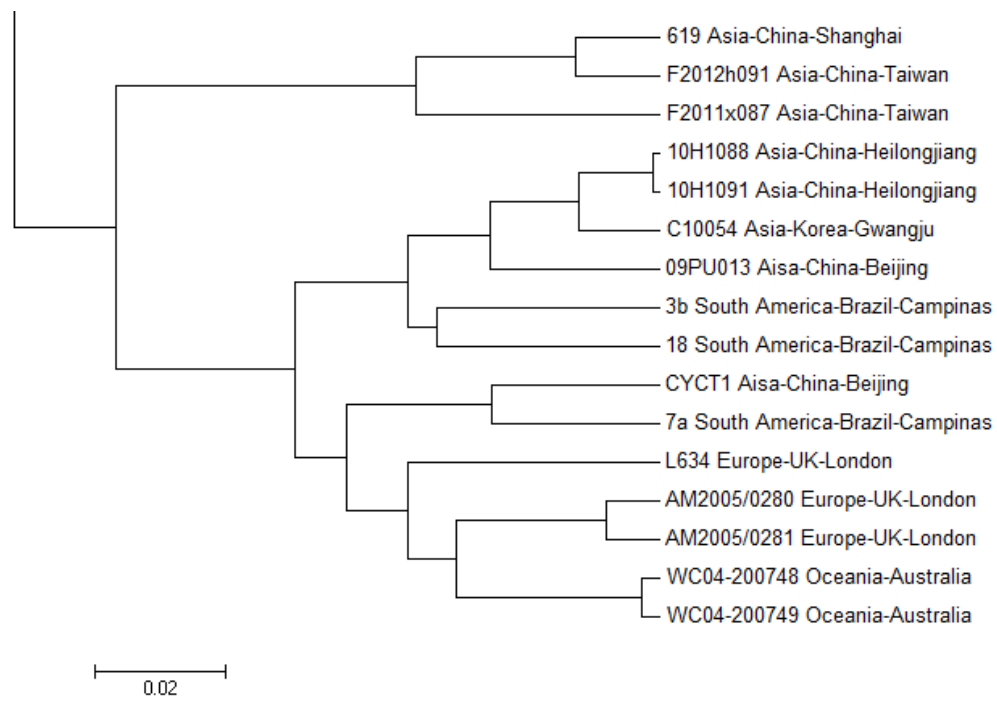

Supplement: Supplementary file [file 14992691]
